# Supplementary material for: Peripheral blood white blood cells, monocytes, basophils, aspartate aminotransferase, and prothrombin time ratio after two cycles of treatment were independently associated with efficacy of neoadjuvant chemoimmunotherapy in non-small cell lung cancer
Source: Research Square preprint supplement (doi:10.21203/rs.3.rs-2452401/v1), 2023-01-16
Supplement: Supplementary file 1 [file 4bd77399dba0222f81df4c95.xlsx]

## Sheet: Sheet1
Supplementary Table 4. Associations of stage and pCR or MPR.
Variables	pCR (n=43)	non-PCR (n=51)	P	MPR (n=67)	non-MPR (n=27)	P
Stages
ⅡB	6 (13.95%)	7 (13.73%)		10 (14.93%)	3 (11.11%)
ⅢA	23 (53.49%)	27 (52.94%)		32 (47.76%)	18 (66.67%)
ⅢB	14 (32.56%)	18 (35.29%)	0.978	26 (38.81%)	6 (22.22%)	0.216
ⅡB-ⅢA	29 (67.44%)	34 (64.71%)		42 (61.19%)	21 (77.78%)
ⅢB	14 (32.56%)	18 (35.29%)	0.833	26 (38.81%)	6 (22.22%)	0.136
pCR: pathological complete response;
MPR: major pathologic response;
