# Supplementary material for: Peripheral blood white blood cells, monocytes, basophils, aspartate aminotransferase, and prothrombin time ratio after two cycles of treatment were independently associated with efficacy of neoadjuvant chemoimmunotherapy in non-small cell lung cancer
Source: Research Square preprint supplement (doi:10.21203/rs.3.rs-2452401/v1), 2023-01-16
Supplement: Supplementary file 2 [file 6f1399e760d16bfa0e3e07b2.xlsx]

## Sheet: Sheet1
Supplementary Table 3. Comparisons of partial factors at baseline and at week 6.
Variables	pCR (n=43)	P	non-PCR (n=51)	P	MPR (n=67)	P	non-MPR (n=27)	P
WBC count (*10^9/l)
At baseline	6.92 (6.02-8.04)		7.53 (5.8-8.79)		7.03 (6.28-8.60)		7.02±2.15	0.081
At week 6 after NCIO	5.31 (4.11-6.13)	<0.001	6.36 (4.84-7.46)	<0.001	5.53 (4.49-6.79）	<0.001	6.18±2.03
Monocyte count (*10^9/l)
At baseline	0.41 (0.32-0.54)		0.39 (0.30-0.49)		0.41 (0.32-0.52)		0.39 (0.28-0.48)
At week 6 after NCIO	0.38 (0.29-0.48)	0.101	0.42 (0.30-0.54)	0.204	0.38 (0.30-0.50)	0.245	0.45 (0.29-0.54)	0.202
Basophil count (*10^9/l)
At baseline	0.04 (0.03-0.06)		0.04 (0.03-0.06)		0.04 (0.02-0.06)		0.04 (0.03-0.06)
At week 6 after NCIO	0.03 (0.02-0.05)	0.006	0.04 (0.02-0.05)	0.317	0.03 (0.02-0.05)	0.01	0.04 (0.03-0.06)	0.428
AST (U/L)
At baseline	19.35 (15.93-23.50)	0.197	20.60 (18.03-24.10)	<0.001	19.35 (16.73-23.70)		21.75 (18.48-23.88)
At week 6 after NCIO	21.55 (18.45-27.05)		25.20 (18.80-32.10)		21.90 (18.40-27.20)	0.072	28.15 (21.63-33.40)	<0.001
pCR: pathological complete response;
MPR: major pathologic response;
WBC: white blood cell;
AST: aspartate aminotransferase.
