# Supplementary material for: Peripheral blood white blood cells, monocytes, basophils, aspartate aminotransferase, and prothrombin time ratio after two cycles of treatment were independently associated with efficacy of neoadjuvant chemoimmunotherapy in non-small cell lung cancer
Source: Research Square preprint supplement (doi:10.21203/rs.3.rs-2452401/v1), 2023-01-16
Supplement: Supplementary file 3 [file 96aa6e8435ddefb88dc6d075.xlsx]

## Sheet: Sheet1
Supplementary Table 1. The associations of others' clinicopathological factors and pCR or MPR.
Variables	pCR (n=44)	non-PCR (n=51)	P	MPR (n=67)	non-MPR (n=28)	P
At baseline:
WBC count (*10^9/l)	6.92 (6.02-8.04)	7.53 (5.8-8.79)	0.849	7.03 (6.28-8.60)	6.87 (5.09-8.30)	0.215
Hemoglobin (g/l)	142.00 (130.25-146.50)	143.00 (130.00-154.00)	0.228	142.00 (130.00-148.00)	145.00 (130.25-158.50)	0.265
PLT (*10^9/l)	248.50 (216.75-305.00)	243.00 (195.00-285.00)	0.289	250.00 (214.00-307.00	242.00 (191.50-281.75)	0.365
Neutrophil count (*10^9/l)	4.63 (3.80-5.92)	4.87 (3.62-5.78)	0.914	4.95 (3.87-5.97)	4.54 (3.28-5.67)	0.129
Neutrophil rate (%)	67.36±7.86	66.74±6.98	0.683	67.75±7.09	65.31±7.85	0.142
Lymphocyte count (*10^9/l)	1.64 (1.30-1.91)	1.66 (1.33-2.17)	0.458	1.66 (1.34-1.93)	1.60 (1.30-2.19)	0.841
Lymphocyte rate (%)	23.10±7.03	24.19±6.43	0.433	23.09±6.42	25.13±7.24	0.177
Eosinophil count (*10^9/l)	0.17 (0.10-0.31)	0.15 (0.08-0.33)	0.431	0.16 (0.09-0.25)	0.17 (0.09-0.36)	0.642
Eosinophil rate (%)	2.35 (1.40-4.03)	2.10 (1.20-3.80)	0.54	2.10 (1.20-3.70)	2.40 (1.33-5.13)	0.405
Basophil count (*10^9/l)	0.04 (0.03-0.06)	0.04 (0.03-0.06)	0.728	0.04 (0.02-0.06)	0.40 (0.03-0.06)	0.323
Basophil rate (%)	0.60 (0.39-0.80)	0.50 (0.40-0.80)	0.988	0.50 (0.30-0.80)	0.70 (0.43-0.90)	0.051
Monocyte count (*10^9/l)	0.41 (0.32-0.54)	0.39 (0.30-0.49)	0.395	0.41 (0.32-0.52)	0.39 (0.28-0.48)	0.335
Monocyte rate (%)	5.65 (4.90-6.65)	5.20 (4.50-6.30)	0.319	5.50 (4.70-6.40)	5.15 (4.75-6.75)	0.71
ALT (U/L)	21.65 (14.03-30.98)	24.55 (16.95-32.13)	0.433	21.65 (14.60-31.13)	24.55 (16.85-30.05)	0.649
AST (U/L)	19.35 (15.93-23.50)	20.60 (18.03-24.10)	0.332	19.35 (16.73-23.70)	21.75 (18.48-23.88)	0.372
AST/ALT	0.95 (0.74-1.22)	0.86 (0.76-1.04)	0.363	0.94 (0.75-1.21)	0.85 (0.76-1.00)	0.413
Albumin (g/l)	40.10 (38.30-43.40)	41.90 (38.55-44.03)	0.231	40.90 (38.25-43.70)	41.10 (38.78-43.65)	0.898
Globulin (g/l)	31.15±4.78	30.07±4.29	0.256	30.93±4.45	29.73±4.66	0.244
Albumin/Globulin	1.31±0.25	1.39±0.23	0.127	1.34±0.24	1.40±0.24	0.267
Total bilirubin (umol/l)	10.77±4.23	11.51±4.44	0.41	11.31±4.72	10.82±3.29	0.62
Direct bilirubin (umol/l)	3.30 (2.03-4.05)	3.25 (2.60-3.83)	0.826	3.30 (2.38-4.13)	3.10 (2.73-3.58)	0.466
Urea (mmol/l)	5.05 (4.40-6.11)	5.24 (4.42-6.13)	0.814	5.03 (4.37-5.90)	5.85 (4.52-6.39)	0.153
Creatinine (umol/l)	72.17±14.86	74.72±14.50	0.402	72.70 (64.80-82.50)	72.95 (60.80-79.73)	0.546
Calcium (mmol/l)	2.31 (2.24-2.39)	2.33 (2.23-2.42)	0.805	2.32 (2.24-2.39)	2.32 (2.18-2.44)	0.668
Magnesium (mmol/l)	0.87±0.07	0.91±0.09	0.074	0.89 (0.86-0.93)	0.88 (0.84-0.94)	0.471
Phosphorus (mmol/l)	1.07±0.18	1.04±0.15	0.374	1.05±0.17	1.07±0.15	0.487
LDH (U/L)	200.45 (181.90-257.85）	211.40 (187.65-252.15)	0.786	205.70 (185.60-256.10)	215.45 (179.33-254.08)	0.993
Glucose (mmol/l)	5.30 (4.99-6.31)	5.27 (4.73-5.62)	0.279	5.30 (4.98-6.09)	5.26 (4.69-5.62)	0.217
PT percentage activity (%)	114.11±17.14	120.46±17.13	0.103	112.90 (105.45-125.50)	122.00 (108.30-136.30)	0.128
APTT (s)	28.55 (26.65-30.43)	28.10 (27.00-32.30)	0.949	28.60 (27.00-30.70)	28.00 (26.65-33.15)	0.799
APTT ratio	1.00 (0.93-1.05)	0.98 (0.95-1.03)	0.858	0.99 (0.94-1.05)	0.98 (0.93-1.03)	0.647
TT (s)	16.85 (15.60-17.63)	17.00 (16.20-18.10)	0.178	16.90 (15.65-17.70)	17.05 (16.48-18.43)	0.166
At week 6 after NCIO:
AST/ALT	1.00 (0.78-1.20）	0.95 (0.76-1.20）	0.596	0.97 (0.77-1.18）	0.96 (0.77-1.26)	0.766
Albumin (g/l)	40.75±3.09	41.45±3.55	0.315	41.21±3.20	40.93±3.74	0.704
Globulin (g/l)	29.38±4.61	28.80±3.57	0.499	29.31±4.31	28.49±3.45	0.373
Albumin/Globulin	1.42±0.22	1.46±0.22	0.31	1.43±0.22	1.46±0.22	0.546
Total bilirubin (umol/l)	8.80 (7.15-10.80）	9.70 (7.80-12.20）	0.121	9.30 (7.40-11.70)	9.40 (7.83-12.28)	0.46
Direct bilirubin (umol/l)	2.65 (1.93-3.28）	2.90 (2.40-3.40）	0.231	2.70 (2.00-3.40)	2.85 (2.40-3.35)	0.701
Urea (mmol/l)	6.12 (4.96 (7.11）	5.86 (4.87-6.71）	0.526	5.86 (4.87-6.67)	6.12 (4.89-7.04)	0.665
Creatinine (umol/l)	77.00 (64.33-87.35）	78.10 (70.40-86.00）	0.435	77.80 (68.50-86.00)	74.50 (67.30-85.93)	0.716
Calcium (mmol/l)	2.29±0.11	2.31±0.12	0.526	2.30±0.11	2.32±0.12	0.45
Phosphorus (mmol/l)	1.17 (1.02-1.28）	1.09 (0.99-1.20）	0.146	1.12 (1.00-1.25）	1.11 (1.01-1.19）	0.8
PT percentage activity (%)	122.20 (111.00-132.30)	127.30 (112.65-134.50)	0.421	125.00 (112.30-133.40）	129.10 (110.65-134.50）	0.72
APTT (s)	27.70 (25.90-31.68）	27.25 (26.10-29.53	0.593	27.55 (25.90-30.55）	27.15 (26.10-29.75）	0.959
APTT ratio	0.99 (0.92-1.04)	0.95 (0.92-1.01)	0.103	0.97 (0.92-1.02）	0.95 (0.92-1.03）	0.585
TT(s)	17.15 (16.68-17.70)	17.15 (16.70-17.80)	0.875	17.10 (16.63-17.78）	17.25 (16.78-17.73）	0.72
Changed values at baseline - at week 6:
Hemoglobin (g/l)	14.00 (5.00-22.75)	12.00 (7.00-24.00)	0.734	13.34±13.85	14.39±14.62	0.741
PLT (*10^9/l)	50.00 (2.00-112.00)	26 (-22.00-78.00)	0.069	42.00 (-10.00-103.00)	34.00 (-20.75-79.50)	0.361
Lymphocyte count (*10^9/l)	0.05±0.43	-0.10±0.48	0.104	-0.01±0.45	-0.10±0.48	0.385
Lymphocyte rate (%)	-6.40 (-12.18- (-1.8))	-4.8 (-9.7- (-1.8))	0.301	-7.01±7.26	-4.61±6.65	0.136
Eosinophil count (*10^9/l)	0.04 (-0.05-0.13)	0.03 (-0.01-0.10)	0.591	0.04 (-0.04-0.09)	0.03 (-0.01-0.16)	0.443
Eosinophil rate (%)	-0.05 (-1.70-1.10)	0.10 (-0.60-1.30)	0.284	0.00 (-1.30-1.00)	0.35 (-0.60-1.50)	0.246
Basophil count (*10^9/l)	0.10 (-0.01-0.02)	0.00 (-0.01-0.02)	0.125	0.01 (-0.01-0.02)	0.00 (-0.01-0.02)	0.442
Basophil rate (%)	0.00 (-0.28-0.10)	-0.10 (-0.20-0.10)	0.86	0.00 (-0.20-0.10）	-0.10 (-0.10-0.18）	0.642
Monocyte rate (%)	-1.68±1.93	-1.72±2.80	0.933	-1.72±2.20	-1.65±2.94	0.893
AST/ALT	-0.01 (-0.26-0.17)	-0.05 (-0.27-0.16)	0.88	-0.01 (-0.26-0.18)	-0.08 (-0.32-0.13)	0.747
Albumin (g/l)	-0.95 (-3.63-1.40)	-0.30 (-2.45-2.95)	0.381	-0.55±4.88	-0.31±4.05	0.819
Globulin (g/l)	1.73±3.67	1.23±3.65	0.505	1.35 (-0.30-3.23)	0.85 (-1.03-3.15)	0.514
Albumin/Globulin	-0.10±0.19	-0.06±0.18	0.249	-0.09±0.20	-0.06±0.16	0.526
Total bilirubin (umol/l)	1.35±4.09	1.02±3.37	0.675	1.38±3.83	0.69±3.43	0.416
Direct bilirubin (umol/l)	0.45 (-0.38-1.10)	0.15 (-0.20-1.10)	0.685	0.40 (-0.30-1.23)	0.15 (-0.18-0.80)	0.631
Urea (mmol/l)	-0.48 (-1.41-0.11)	-0.75 (-1.50-0.39)	0.636	-0.72±1.38	-0.36±1.53	0.269
Creatinine (umol/l)	-5.66±11.57	-5.28±9.52	0.862	-5.11±11.33	-6.27±8.15	0.627
Calcium (mmol/l)	0.02 (-0.08-0.11)	0.01 (-0.09-0.10)	0.654	0.03 (-0.07-0.11)	-0.04 (-0.11-0.06)	0.182
Magnesium (mmol/l)	0.05±0.08	0.03±0.07	0.33	0.05±0.07	0.03±0.07	0.21
Phosphorus (mmol/l)	-0.06 (-0.26-0.05)	-0.06 (-0.16-0.06)	0.528	-0.06 (-0.25-0.05)	-0.04 (-0.11-0.05)	0.376
LDH	30.00 (-6.38-48.15)	-11.20 (-51.70-39.00)	0.089	23.04±64.78	-20.49±39.44	0.104
Glucose (mmol/l)	0.10 (-0.27-0.68)	-0.09 (-0.44-0.30)	0.147	-0.02 (-0.32-0.36)	-0.04 (-0.32-0.31)	0.886
PT (s)	0.20 (-0.40-1.10)	0.20 (-0.20-0.90)	0.678	0.20 (-0.40-1.00)	0.20 (-0.20-0.95)	0.977
PT ratio	0.01±0.07	0.02±0.06	0.485	0.01 (-0.03-0.05)	0.01 (-0.02-0.08)	0.87
PT percentage activity (%)	-8.05 (-22.28-6.03)	-9.25 (-19.73-8.35)	0.689	-9.10 (-21.40-4.70)	-3.10 (-19.50-12.30)	0.234
APTT (s)	0.60 (-0.30-1.90)	1.20 (0.40-2.00)	0.133	0.90 (0.10-2.00）	0.70 (-0.50-2.15)	0.926
APTT ratio	0.02 (-0.02-0.45)	0.03 (-0.01-0.07)	0.155	0.02 (-0.01-0.06)	0.02 (-0.02-0.07)	0.86
TT (s)	-0.30 (-1.35-0.25)	-0.30 (-0.90-0.70)	0.379	-0.40 (-1.30-0.50)	0.00 (-0.65-0.85)	0.238
FIB (g/l)	0.57 (-0.03-1.62)	0.33 (-0.17-1.01)	0.161	0.57 (0.00-1.55)	0.20 (-0.53-0.71)	0.015
INR	0.02 (-0.03-0.08)	0.02 (-0.02-0.07)	0.853	0.02 (-0.03-0.07)	0.02 (-0.02-0.09）	0.78
D-dimer (mg/l)	0.00 (-0.14-0.11)	-0.06 (-0.16-0.01)	0.158	-0.04 (-0.16-0.10)	-0.07 (-0.15-0.00)	0.321
Changed rate:
Hemoglobin (g/l)	0.09 (0.03-0.15)	0.09 (0.05-0.16)	0.829	0.09 (0.04-0.15)	0.09 (0.06-0.16)	0.948
PLT (*10^9/l)	0.21 (0.01-0.37)	0.15 (-0.09-0.25)	0.053	0.18 (-0.03-0.37)	0.15 (-0.08-0.27)	0.224
Lymphocyte count (*10^9/l)	0.08 (-0.17-0.20)	-0.05 (-0.21-0.13)	0.109	0.03 (-0.18-0.16)	-0.04 (-0.23-0.16)	0.438
Lymphocyte rate (%)	-0.23 (-0.53- (-0.06)	-0.24 (-0.45- (-0.06)	0.391	-0.25 (-0.48- (-0.09))	-0.19 (-0.40-0.03)	0.192
Eosinophil count (*10^9/l)	0.22 (-0.61-0.68)	0.21 (-0.13-0.50)	0.926	0.22 (-0.44-0.57)	0.20 (-0.08-0.50)	0.826
Eosinophil rate (%)	-0.06 (-0.91-0.54)	0.09 (-0.57-0.46)	0.55	0.00 (-0.84-0.47)	0.12 (-0.52-0.46)	0.47
Basophil count (*10^9/l)	0.21 (-0.13-0.50)	0.00 (-0.33-0.33)	0.058	0.17 (-0.20-0.50)	0.00 (-0.31-0.33)	0.165
Basophil rate (%)	0.00 (-0.50-0.24)	-0.13 (-0.40-0.20)	0.708	0.00 (-0.50-0.20)	-0.10 (-0.25-0.30)	0.601
Monocyte rate (%)	-0.32±0.38	-0.35±0.48	0.735	-0.32±0.40	-0.35±0.52	0.811
ALT (U/L)	-0.06 (-0.75-0.27)	-0.12 (-0.75-0.24)	0.481	-0.06 (-0.74-0.27)	-0.18 (-1.01-0.23)	0.498
AST/ALT	-0.01 (-0.33-0.16)	-0.06 (-0.33-0.17)	0.844	0.00 (-0.32-0.17)	-0.09 (-0.40-0.17)	0.392
Albumin (g/l)	-0.02 (-0.08-0.04)	-0.01 (-0.06-0.07)	0.431	-0.12 (-0.08-0.05)	0.00 (-0.07-0.06)	0.888
Globulin (g/l)	0.05±0.12	0.03±0.12	0.462	0.04±0.11	0.03±0.13	0.549
Albumin/Globulin	-0.07 (-0.18-0.00)	-0.05 (-0.14-0.03)	0.214	-0.08±0.17	-0.06±0.13	0.441
Total bilirubin (umol/l)	0.05 (-0.17-0.32)	0.08 (-0.13-0.26)	0.77	0.05±0.36	0.01±0.31	0.628
Direct bilirubin (umol/l)	0.15 (-0.11-0.35)	0.05 (-0.08-0.34)	0.803	0.13 (-0.09-0.36)	0.05 (-0.06-0.25)	0.629
Urea (mmol/l)	-0.10 (-0.34-0.01)	-0.01 (-0.30-0.07)	0.516	-0.17±0.29	-0.10±0.27	0.27
Creatinine (umol/l)	-0.08±0.15	-0.08±0.13	0.872	-0.08±0.15	-0.09±0.11	0.737
Calcium (mmol/l)	0.01 (-0.03-0.04)	0.00 (-0.04-0.04)	0.69	0.01 (-0.03-0.05)	-0.01 (-0.05-0.03)	0.189
Magnesium (mmol/l)	0.06±0.09	0.04±0.08	0.284	0.05±0.08	0.03±0.08	0.21
Phosphorus (mmol/l)	-0.04 (-0.31-0.04)	-0.07 (-0.14-0.05)	0.57	-0.05 (-0.27-0.05)	-0.03 (-0.11-0.05)	0.387
Glucose (mmol/l)	0.02 (-0.05-0.11)	-0.02 (-0.09-0.05)	0.146	0.01±0.15	0.00±0.09	0.787
PT(s)	0.02 (-0.03-0.10)	0.02 (-0.02-0.08)	0.695	0.02 (-0.03-0.09)	0.02 (-0.02-0.09)	0.969
PT ratio	0.01±0.08	0.02±0.06	0.455	0.01±0.07	0.01±0.06	0.972
PT percentage activity (%)	-0.07 (-0.20-0.05)	-0.08 (-0.17-0.08)	0.648	-0.08 (-0.19-0.04)	-0.02 (-0.19-0.09)	0.249
APTT (s)	0.02 (-0.01-0.07)	0.04 (0.02-0.07)	0.156	0.03 (0.00-0.07)	0.03 (-0.02-0.08)	0.903
APTT ratio	0.02 (-0.02-0.05)	0.03 (-0.01-0.07)	0.142	0.02 (-0.01-0.06)	0.02 (-0.02-0.07)	0.804
TT(s)	-0.02 (-0.08-0.01)	-0.02 (-0.06-0.04)	0.337	-0.02 (-0.08-0.03)	0.00 (-0.04-0.05)	0.229
FIB(g/l)	0.15 (-0.01-0.32)	0.10 (-0.05-0.22)	0.184	0.15 (0.00-0.31)	0.04 (-0.17-0.18)	0.019
INR	0.02 (-0.03-0.09)	0.21 (-0.02-0.07)	0.85	0.02 (-0.03-0.07)	0.02 (-0.02-0.09)	0.795
D-dimer (mg/l)	-0.03 (-0.63-0.33)	-0.29 (-0.72-0.03)	0.292	-0.18 (-0.64-0.33)	-0.32 (-0.74-0.00)	0.362
pCR: pathological complete response;
MPR: major pathologic response;
WBC: white blood cell;
PLT: platelet;
ALT: alanine aminotransferase;
AST: aspartate aminotransferase.
LDH: lactate dehydrogenase
PT: prothrombin time
APTT: activated partial thromboplastin time
TT: thrombin time
NCIO: neoadjuvant chemoimmunotherapy;
FIB: fibrinogen
INR: international normalized ratio
Changed rate=△value/value at baseline.
