# Supplementary material for: Peripheral blood white blood cells, monocytes, basophils, aspartate aminotransferase, and prothrombin time ratio after two cycles of treatment were independently associated with efficacy of neoadjuvant chemoimmunotherapy in non-small cell lung cancer
Source: Research Square preprint supplement (doi:10.21203/rs.3.rs-2452401/v1), 2023-01-16
Supplement: Supplementary file 4 [file f3df3c0c70f547198d8edc79.xlsx]

## Sheet: Sheet1
Supplementary Table 2. ROC curves analysis for pCR or MPR.
Variables	Cutoff: value	AUC (95%CI)	Sensitivity	Specifcity	P
pCR:
At baseline:
PT (s)	10.75	0.635 (0.520-0.750)	0.714	0.592	0.027
PT ratio	0.945	0.664 (0.542-0.785)	0.667	0.682	0.012
INR	0.935	0.643 (0.529-0.757)	0.69	0.592	0.019
At week 6 after NCIO:
WBC count (*10^9/l)	6.305	0.629 (0.516-0.742)	0.818	0.51	0.03
Neutrophil count (*10^9/l)	2.93	0.628 (0.516-0.741)	0.523	0.725	0.032
Lymphocyte count (*10^9/l)	1.63	0.642 (0.530-0.754)	0.636	0.627	0.017
Magnesium (mmol/l)	-	-	-	-	0.094
LDH (U/L)	194.6	0.681 (0.524-0.839)	0.429	0.923	0.034
PT (s)	10.95	0.648 (0.529-0.767)	0.5	0.792	0.019
PT ratio	0.965	0.631 (0.507-0.756)	0.314	0.933	0.045
INR	0.975	0.626 (0.507-0.745)	0.342	0.896	0.046
Changed values at baseline - at week 6:
△WBC count (*10^9/l)	0.885	0.652 (0.541-0.763)	0.727	0.608	0.011
△Neutrophil count (*10^9/l)	0.295	0.633 (0.521-0.745)	0.909	0.333	0.026
△Neutrophil rate	-	-	-	-	0.088
△Monocyte count (*10^9/l)	-0.085	0.630 (0.519-0.741)	0.864	0.392	0.029
Changed rates:
△WBC count' ratie	0.0923	0.668 (0.558-0.778)	0.818	0.549	0.005
△Neutrophil count' rate	0.27512	0.661 (0.551-0.771)	0.636	0.667	0.007
△Neutrophil rate' rate	-	-	-	-	0.071
△Monocyte count' rate	-0.30625	0.629 (0.517-0.740)	0.886	0.392	0.031
△LDH' rate	-	-	-	-	0.058
MPR:
At baseline:
PT ratio	0.935	0.664 (0.534-0.794)	0.579	0.696	0.022
FIB (g/l)	3.385	0.651 (0.526-0.775)	0.708	0.538	0.025
At week 6 after NCIO:
Basophil count (*10^9/l)	0.035	0.639 (0.520-0.758)	0.537	0.75	0.033
AST (U/L)	29.85	0.672 (0.546-0.798)	0.866	0.464	0.008
Glucose (mmol/l)	5.845	0.644 (0.521-0.767)	0.286	1	0.042
PT (s)	10.95	0.659 (0.537-0.781)	0.417	0.846	0.02
INR	0.885	0.641 (0.513-0.768)	0.783	0.462	0.039
Changed values at baseline - at week 6:
△WBC (*10^9/l)	0.565	0.680 (0.550-0.810)	0.776	0.607	0.006
△Neutrophil count (*10^9/l)	0.065	0.659（0.530-0.788）	0.94	0.393	0.015
△AST (U/L)	-9.9	0.644 (0.524-0.765)	0.864	0.393	0.028
Changed rates:
△WBC count' rate	0.1115	0.680 (0.551-0.808)	0.672	0.679	0.006
△Neutrophil count' rate	0.0365	0.664（0.539-0.790）	0.925	0.393	0.012
△Monocyte count' rate	-0.3355	0.630 (0.493-0.766)	0.881	0.429	0.047
△AST (U/L)	-0.32983	0.636 (0.516-0.756)	0.727	0.536	0.037
AUC: area under curve
pCR: pathological complete response;
MPR: major pathologic response;
PT: prothrombin time
INR: international normalized ratio
NCIO: neoadjuvant chemoimmunotherapy;
WBC: white blood cell;
LDH: lactate dehydrogenase
FIB: fibrinogen
AST: aspartate aminotransferase.
Changed rate=△value/value at baseline.
